# Supplementary material
Source: PubMed Central journal article supplement (PMC6014710)
Supplement: EHP1992.s001.acco.pdf [file EHP1992.s001.acco.pdf]

**Note to readers with disabilities:** *EHP* strives to ensure that all journal content is accessible to all readers. However, some figures and Supplemental Material published in *EHP* articles may not conform to [508 standards](#) due to the complexity of the information being presented. If you need assistance accessing journal content, please contact [ehp508@niehs.nih.gov](mailto:ehp508@niehs.nih.gov). Our staff will work with you to assess and meet your accessibility needs within 3 working days.

### **Supplemental Material**

#### **Arsenic Exposure from Drinking Water and Urinary Metabolomics: Associations and Long-Term Reproducibility in Bangladesh Adults**

Fen Wu, Liang Chi, Hongyu Ru, Faruque Parvez, Vesna Slavkovich, Mahbub Eunos, Alauddin Ahmed, Tariqul Islam, Muhammad Rakibuz-Zaman, Rabiul Hasan, Golam Sarwar, Joseph H. Graziano, Habibul Ahsan, Kun Lu, and Yu Chen

#### **Table of Contents**

**Additional File** - Excel Document
